# Supplementary material
Source: PubMed Central journal article supplement (PMC2731691)
Supplement: NIHMS131486-supplement-supplement_1.pdf [file NIHMS131486-supplement-supplement_1.pdf]

**Figure legends:**

**Figure 1.** Flow cytometry gating strategy shows derivation of CD11c+ MDC and CD123+ PDC, from HLA-DR<sup>high</sup> Lineage negative (Lin-) PBL in a Rejector and Non-Rejector after LTx with rATG.

**Figure 2:** Longitudinal changes in DC subset frequencies, absolute counts, and the MDC: PDC ratio in Rejectors and Non-Rejectors. Also shown are mean frequencies in 10 normal adult human subjects .

**Supplementary Figure 1.** A significant negative correlation is seen between FKWB (whole blood Tacrolimus concentrations in ng/ml) and PDC frequencies in 48 cross-sectional subjects.

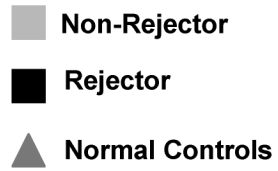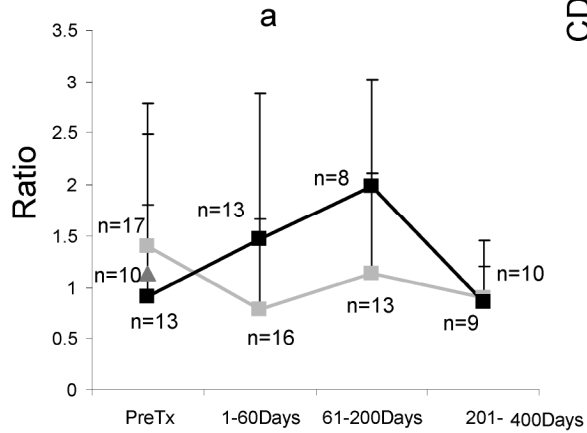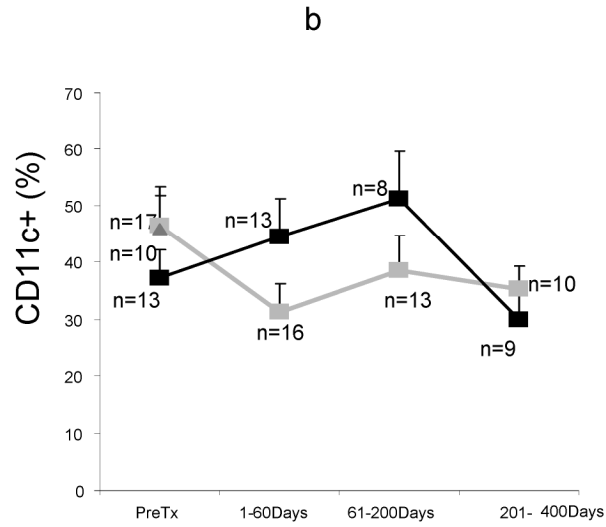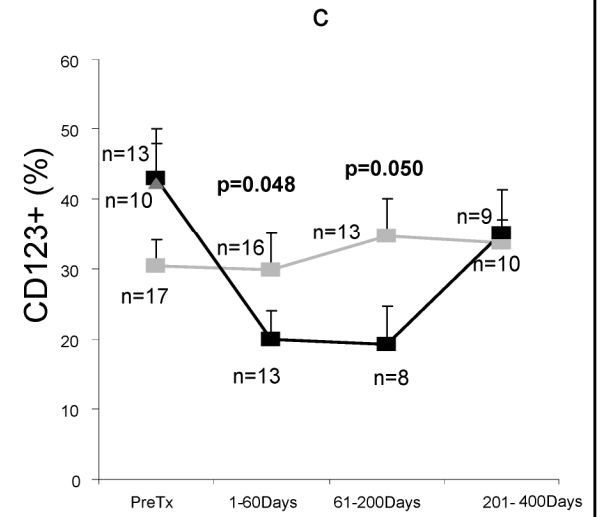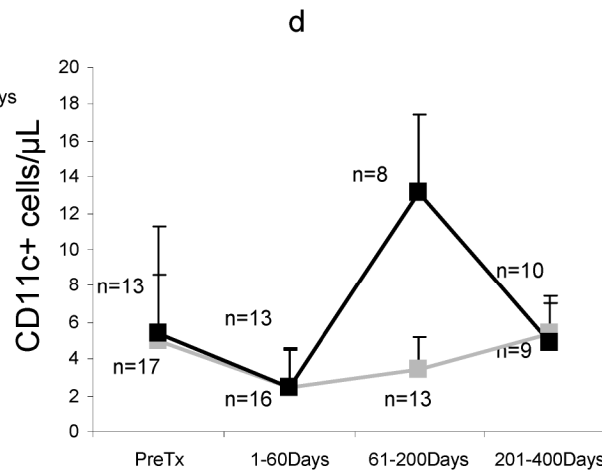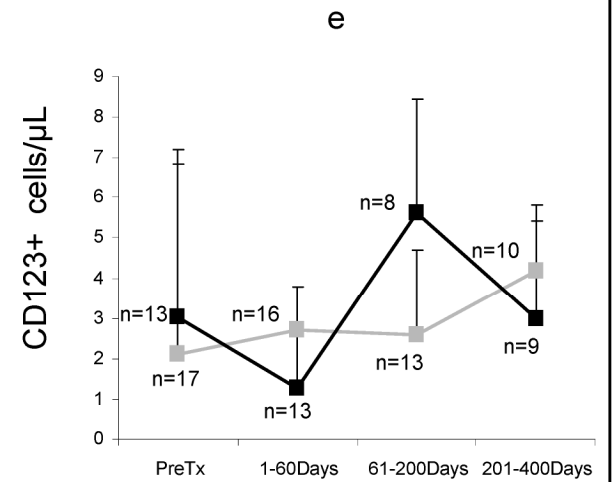

Type of file: figure

Label: 3

Filename: supplementary figure 1.tif

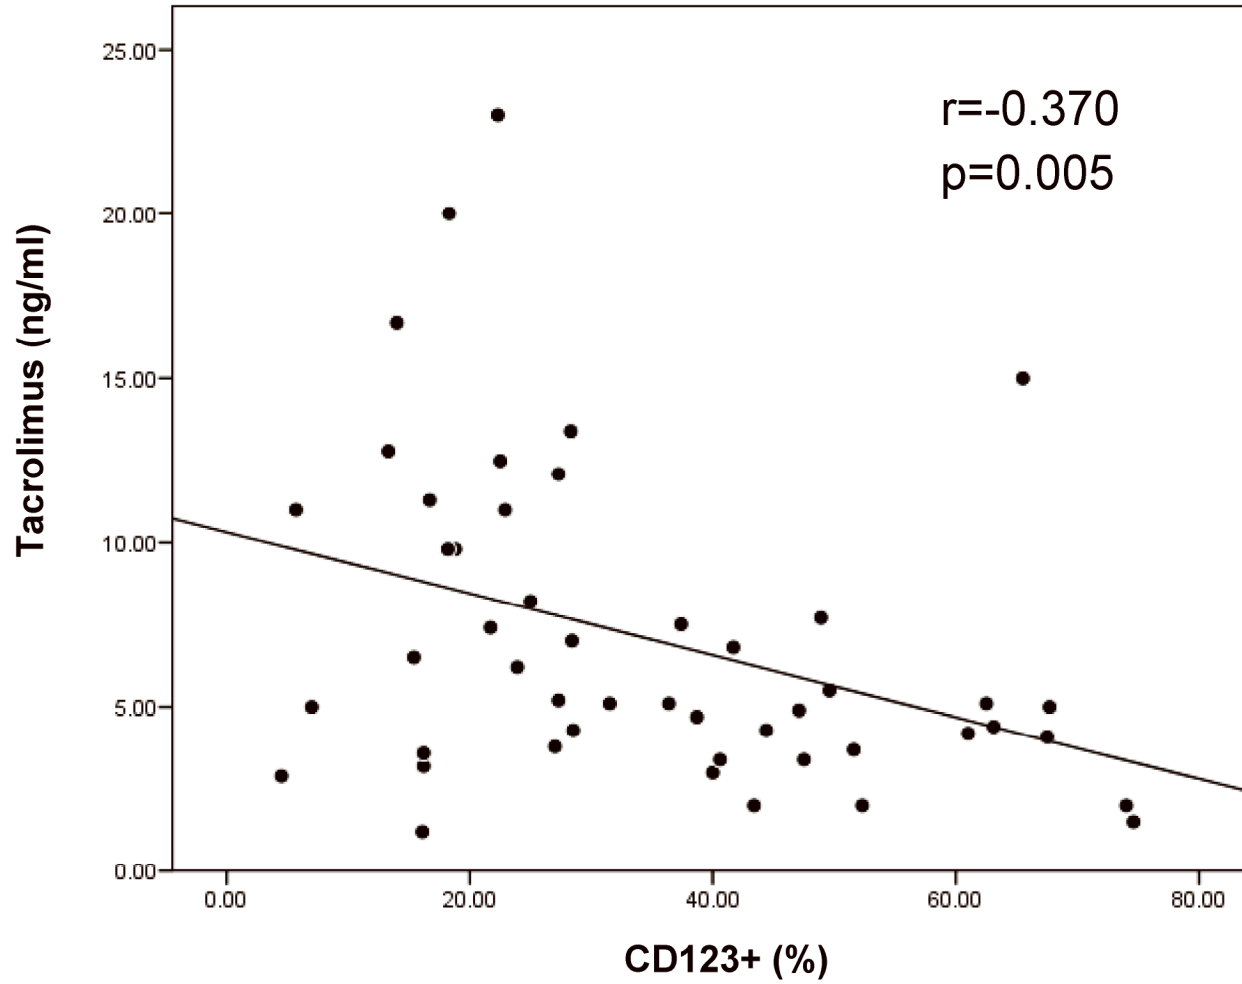

Type of file: table

Label:

Filename: Supplementary Tables.doc

**Supplementary Table 1:** Primary diagnoses leading to liver transplantation.

| Diagnosis                   | Rejectors | Non-<br>Rejectors |
|-----------------------------|-----------|-------------------|
| Maple Syrup Urine Disease   | 7         | 9                 |
| Crigler Najjar Syndrome     | 2         | 0                 |
| Fulminant Hepatic Failure   | 3         | 1                 |
| Sclerosing Cholangitis      | 4         | 1                 |
| Biliary Atresia             | 9         | 11                |
| Wilson's Disease            | 1         | 0                 |
| Polycystic Disease          | 0         | 1                 |
| Methylmelonic acidemia      | 1         | 2                 |
| Autoimmune hepatitis        | 0         | 2                 |
| Histiocytosis               | 0         | 1                 |
| Intrahepatic cholestasis    | 0         | 1                 |
| Cystic Fibrosis             | 0         | 2                 |
| Tyrosinemia                 | 1         | 1                 |
| Cryptogenic cirrhosis       | 0         | 2                 |
| Bile Duct paucity           | 0         | 1                 |
| Congenital HCV              | 1         | 0                 |
| Alagilles Syndrome          | 2         | 1                 |
| Congenital hepatic fibrosis | 1         | 2                 |
| Neonatal Hepatitis          | 0         | 1                 |
| Metabolic Disease           | 1         | 1                 |
| Rhabdoid tumor              | 1         | 0                 |
| Gastroschisis               | 0         | 1                 |
| Carolis Disease             | 1         | 0                 |
| Alagilles Disease           | 0         | 1                 |
| Hepatoblastoma              | 0         | 1                 |
| Total                       | 35        | 43                |

**Supplementary Table 2:** Longitudinal changes in DC subset frequencies and ratio in 30 children.

| Parameter                        | Pre-Tx<br>(R=13 vs NR =17)         | 1-60 Days<br>(R=13 vs NR=16)             | 61-200 Days<br>(R=8 vs NR=13)             | 201-400 Days<br>(R=9 vs NR=10)    |
|----------------------------------|------------------------------------|------------------------------------------|-------------------------------------------|-----------------------------------|
| MDC%<br>(Median±SEM)             | 37.3±4.9 vs<br>46.4± 5.4<br>p=NS   | 44.4±6.8 vs<br>31.3±5.0<br>p=NS          | 51.2±8.4 vs<br>38.6±6.0<br>p=NS           | 30.0±5.6 vs<br>35.3±4.0<br>p=NS   |
| PDC%<br>(Median±SEM)             | 42.9±5.0 vs<br>30.3±3.8<br>p=NS    | 20.0±13 vs<br>29.9±5.2<br><b>p=0.048</b> | 19.25±5.5 vs<br>34.6±8.4<br><b>p=0.05</b> | 35.1±6.2 vs<br>33.7±3.3<br>p=NS   |
| MDC:PDC<br>Ratio<br>(Median±SEM) | 0.91±1.87 vs<br>1.4 ± 0.41<br>p=NS | 1.47 ±1.42 vs<br>0.78±0.89<br>p=NS       | 1.99±1.04 vs<br>1.13± 1.99<br>p=NS        | 0.85±0.60 vs<br>0.90±0.60<br>p=NS |

**Supplementary Table 3:** Longitudinal changes in DC subset absolute counts and ratio in 30 children.

| Parameter                                | Pre-Tx<br>(R=13 vs NR =17)                    | 1-60 Days<br>(R=13 vs NR=16)                  | 61-200 Days<br>(R=8 vs NR=13)                  | 201-400 Days<br>(R=9 vs NR=10)                |
|------------------------------------------|-----------------------------------------------|-----------------------------------------------|------------------------------------------------|-----------------------------------------------|
| MDC cells/ $\mu$ L<br>(Median $\pm$ SEM) | 5.40 $\pm$ 3.19 vs<br>5.02 $\pm$ 6.26<br>p=NS | 2.42 $\pm$ 2.17 vs<br>2.44 $\pm$ 2.07<br>p=NS | 13.10 $\pm$ 4.38 vs<br>3.40 $\pm$ 1.81<br>p=NS | 4.87 $\pm$ 2.18 vs<br>5.40 $\pm$ 2.10<br>p=NS |
| PDC cells/ $\mu$ L<br>(Median $\pm$ SEM) | 3.03 $\pm$ 3.83 vs<br>2.10 $\pm$ 5.10<br>p=NS | 1.28 $\pm$ 1.48 vs<br>2.71 $\pm$ 1.08<br>p=NS | 5.60 $\pm$ 2.86 vs<br>2.60 $\pm$ 2.10<br>p=NS  | 2.97 $\pm$ 2.44 vs<br>4.18 $\pm$ 1.65<br>p=NS |
| MDC:PDC<br>Ratio<br>(Median $\pm$ SEM)   | 0.91 $\pm$ 1.87 vs<br>1.4 $\pm$ 0.41<br>p=NS  | 1.47 $\pm$ 1.42 vs<br>0.78 $\pm$ 0.89<br>p=NS | 1.99 $\pm$ 1.04 vs<br>1.13 $\pm$ 1.99<br>p=NS  | 0.85 $\pm$ 0.60 vs<br>0.90 $\pm$ 0.60<br>p=NS |
